# Supplementary material for: Advanced Practice Nursing Roles, Regulation, Education, and Practice: A Global Study
Source: PubMed Central journal article supplement (PMC9205376; doi:10.5334/aogh.3698), 2022-06-16
Supplement: agh-88-1-3698-s1.pdf [file agh-88-1-3698-s1.pdf]

## Appendices

### Appendix A. Practice Role

| Country          | <i>n</i> | Title for NP/APN                                                                                                                            | Title Protection | Types of Positions Evident There                                                                                                                                                                                                                                                                                                                                                                                                                                                                                    | Professional Role Issues Evident There                                                                                                                                                                                                                                                                                                                                                                                                                                                                                                                                                                                                                                                                                                                                                                                                                                               | Skills Evident There                                                                                                                                                                                                                                                                                                                                                                                                                                                                                                                                                                                                                                                                                                                                                                                                                                                                                                                              |
|------------------|----------|---------------------------------------------------------------------------------------------------------------------------------------------|------------------|---------------------------------------------------------------------------------------------------------------------------------------------------------------------------------------------------------------------------------------------------------------------------------------------------------------------------------------------------------------------------------------------------------------------------------------------------------------------------------------------------------------------|--------------------------------------------------------------------------------------------------------------------------------------------------------------------------------------------------------------------------------------------------------------------------------------------------------------------------------------------------------------------------------------------------------------------------------------------------------------------------------------------------------------------------------------------------------------------------------------------------------------------------------------------------------------------------------------------------------------------------------------------------------------------------------------------------------------------------------------------------------------------------------------|---------------------------------------------------------------------------------------------------------------------------------------------------------------------------------------------------------------------------------------------------------------------------------------------------------------------------------------------------------------------------------------------------------------------------------------------------------------------------------------------------------------------------------------------------------------------------------------------------------------------------------------------------------------------------------------------------------------------------------------------------------------------------------------------------------------------------------------------------------------------------------------------------------------------------------------------------|
| <b>Australia</b> | 5        | Nurse Practitioner, re: midwifery-generally non-nurse undergraduate degree though registered nurses can obtain Master of Midwifery Practice | Yes              | <ul style="list-style-type: none"> <li>*Physician's office</li> <li>*Independent nursing practice</li> <li>*Hospital based clinic</li> <li>*Community based clinic</li> <li>*Public health or ministry of health</li> <li>*Hospital</li> <li>*Home health care facility</li> <li>*Long term care facility</li> <li>*Specialty practice</li> <li>*Mental health</li> <li>*School health</li> <li>*Occupational or workplace health</li> <li>*Faculty position</li> <li>*Administration</li> <li>*Research</li> </ul> | <ul style="list-style-type: none"> <li>*Maintains personal liability/indemnity/malpractice insurance</li> <li>*Carries their own caseload of clients/patients</li> <li>*Has the authority to prescribe medications</li> <li>*Has the authority to dispense/furnish medications</li> <li>*Has the authority to order diagnostic tests</li> <li>*Refers to other health care professionals</li> <li>*Seeks out consultation with other health professionals</li> <li>*Other professionals seek out consultations with the NP/APN</li> <li>*Receives direct payments for services for clients</li> <li>*Receives payment for serviced from other sources (i.e., National Health Service [NHS] or insurance companies)</li> <li>*Practices independently without physician supervision</li> <li>*Practice activities for these types of NP/APN actions varies by jurisdiction</li> </ul> | <ul style="list-style-type: none"> <li>*Skin lesion removal/skin biopsy/superficial abscess incision and drainage/foreign body removal</li> <li>*Nail removal</li> <li>*Cerumen removal</li> <li>*Fluorescein stain to eye</li> <li>*Joint aspirations and injections</li> <li>*Therapeutic injections (such as for osteoporosis or rheumatoid arthritis)</li> <li>*Wound management</li> <li>*Surgical debridement</li> <li>*Splinting</li> <li>*Casting</li> <li>*Suturing</li> <li>*Pulmonary function tests and office spirometry</li> <li>*Pap tests</li> <li>*In-dwelling contraceptive management (IUDs) and/or long term hormonal implantation</li> <li>*Microscopy</li> <li>*12 lead ECG interpretation</li> <li>*X-ray interpretation</li> <li>*Midwifery</li> <li>*Critical care/emergency acts (intubation, chest tube insertion/removal, central line insertion)</li> <li>*Nerve blocks</li> <li>*Sedation for procedures</li> </ul> |
| <b>Botswana</b>  | 2        | Nurse Practitioner, Clinical Nurse Specialist, Community Health Nurse, Midwife                                                              | Yes              | <ul style="list-style-type: none"> <li>*Physician's office</li> <li>*Independent nursing practice</li> <li>*Hospital based clinic</li> <li>*Community based clinic</li> <li>*Public health or ministry of health</li> <li>*Hospital</li> <li>*Home health care facility</li> <li>*Long term care facility</li> <li>*Specialty practice</li> <li>*Mental health</li> <li>*School health</li> <li>*Occupational or workplace health</li> <li>*Faculty position</li> <li>*Administration</li> <li>*Research</li> </ul> | <ul style="list-style-type: none"> <li>*Carries their own caseload of clients/patients</li> <li>*Has the authority to prescribe medications,</li> <li>*Has the authority to dispense/furnish medications</li> <li>*Has the authority to order diagnostic tests</li> <li>*Refers to other health care professionals</li> <li>*Seeks out consultation with other health professionals</li> <li>*Other professionals seek out consultations with the NP/APN</li> <li>*Receives direct payments for services for clients</li> <li>*Practices independently without physician supervision</li> <li>*Practice activities for these types of NP/APN</li> </ul>                                                                                                                                                                                                                              | <ul style="list-style-type: none"> <li>*Skin lesion removal/skin biopsy/superficial abscess incision and drainage/foreign body removal</li> <li>*Cerumen removal</li> <li>*Wound management</li> <li>*Casting</li> <li>*Suturing</li> <li>*Pap tests</li> <li>*In-dwelling contraceptive management (IUDs) and/or long term hormonal implantation</li> <li>*12 lead ECG interpretation</li> <li>*X-ray interpretation</li> <li>*Midwifery</li> <li>*Critical care/emergency acts (intubation, chest tube insertion/removal, central line insertion)</li> <li>*Sedation for procedures</li> </ul>                                                                                                                                                                                                                                                                                                                                                  |

|                                                           |    |                                                              |     |                                                                                                                                                                                                                                                                                                                                                                                                                                                                                                                     |                                                                                                                                                                                                                                                                                                                                                                                                                                                                                                                                                                                                                                                                                                                                                                                                                                                                                      |                                                                                                                                                                                                                                                                                                                                                                                                                                                                                                                                                                                                                                                                                                                                                                                                                                                                                                                                                   |
|-----------------------------------------------------------|----|--------------------------------------------------------------|-----|---------------------------------------------------------------------------------------------------------------------------------------------------------------------------------------------------------------------------------------------------------------------------------------------------------------------------------------------------------------------------------------------------------------------------------------------------------------------------------------------------------------------|--------------------------------------------------------------------------------------------------------------------------------------------------------------------------------------------------------------------------------------------------------------------------------------------------------------------------------------------------------------------------------------------------------------------------------------------------------------------------------------------------------------------------------------------------------------------------------------------------------------------------------------------------------------------------------------------------------------------------------------------------------------------------------------------------------------------------------------------------------------------------------------|---------------------------------------------------------------------------------------------------------------------------------------------------------------------------------------------------------------------------------------------------------------------------------------------------------------------------------------------------------------------------------------------------------------------------------------------------------------------------------------------------------------------------------------------------------------------------------------------------------------------------------------------------------------------------------------------------------------------------------------------------------------------------------------------------------------------------------------------------------------------------------------------------------------------------------------------------|
|                                                           |    |                                                              |     |                                                                                                                                                                                                                                                                                                                                                                                                                                                                                                                     | actions varies by jurisdiction                                                                                                                                                                                                                                                                                                                                                                                                                                                                                                                                                                                                                                                                                                                                                                                                                                                       |                                                                                                                                                                                                                                                                                                                                                                                                                                                                                                                                                                                                                                                                                                                                                                                                                                                                                                                                                   |
| <b>Canada</b>                                             | 85 | Nurse Practitioner, Clinical Nurse Specialist                | Yes | <ul style="list-style-type: none"> <li>*Physician's office</li> <li>*Independent nursing practice</li> <li>*Hospital based clinic</li> <li>*Community based clinic</li> <li>*Public health or ministry of health</li> <li>*Hospital</li> <li>*Home health care facility</li> <li>*Long term care facility</li> <li>*Specialty practice</li> <li>*Mental health</li> <li>*School health</li> <li>*Occupational or workplace health</li> <li>*Faculty position</li> <li>*Administration</li> <li>*Research</li> </ul> | <ul style="list-style-type: none"> <li>*Maintains personal liability/indemnity/malpractice insurance</li> <li>*Carries their own caseload of clients/patients</li> <li>*Has the authority to prescribe medications</li> <li>*Has the authority to dispense/furnish medications</li> <li>*Has the authority to order diagnostic tests</li> <li>*Refers to other health care professionals</li> <li>*Seeks out consultation with other health professionals</li> <li>*Other professionals seek out consultations with the NP/APN</li> <li>*Receives direct payments for services for clients</li> <li>*Receives payment for serviced from other sources (i.e., National Health Service [NHS] or insurance companies)</li> <li>*Practices independently without physician supervision</li> <li>*Practice activities for these types of NP/APN actions varies by jurisdiction</li> </ul> | <ul style="list-style-type: none"> <li>*Skin lesion removal/skin biopsy/superficial abscess incision and drainage/foreign body removal</li> <li>*Nail removal</li> <li>*Cerumen removal</li> <li>*Fluorescein stain to eye</li> <li>*Joint aspirations and injections</li> <li>*Therapeutic injections (such as for osteoporosis or rheumatoid arthritis)</li> <li>*Wound management</li> <li>*Surgical debridement</li> <li>*Splinting</li> <li>*Casting</li> <li>*Suturing</li> <li>*Pulmonary function tests and office spirometry</li> <li>*Pap tests</li> <li>*In-dwelling contraceptive management (IUDs) and/or long term hormonal implantation</li> <li>*Microscopy</li> <li>*12 lead ECG interpretation</li> <li>*X-ray interpretation</li> <li>*Midwifery</li> <li>*Critical care/emergency acts (intubation, chest tube insertion/removal, central line insertion)</li> <li>*Nerve blocks</li> <li>*Sedation for procedures</li> </ul> |
| <b>Chile</b>                                              | 3  | Advanced Practice Nurse, Master of Advanced Practice Nursing | No  | <ul style="list-style-type: none"> <li>*Hospital based clinic</li> <li>*Public health or ministry of health</li> <li>*Hospital</li> <li>*School health</li> <li>*Faculty position</li> <li>*Administration</li> </ul>                                                                                                                                                                                                                                                                                               | *No evidence                                                                                                                                                                                                                                                                                                                                                                                                                                                                                                                                                                                                                                                                                                                                                                                                                                                                         | <ul style="list-style-type: none"> <li>*Wound management</li> <li>*Midwifery</li> </ul>                                                                                                                                                                                                                                                                                                                                                                                                                                                                                                                                                                                                                                                                                                                                                                                                                                                           |
| <b>Ecuador (role not established outside US agencies)</b> | 1  | Nurse Practitioner (where present in US agencies)            | No  | *Other (role present only in US agencies)                                                                                                                                                                                                                                                                                                                                                                                                                                                                           | *Other (role present only in US agencies)                                                                                                                                                                                                                                                                                                                                                                                                                                                                                                                                                                                                                                                                                                                                                                                                                                            | *Other (role present only in US agencies)                                                                                                                                                                                                                                                                                                                                                                                                                                                                                                                                                                                                                                                                                                                                                                                                                                                                                                         |
| <b>Finland</b>                                            | 4  | Nurse Practitioner, Clinical Nurse Specialist                | No  | <ul style="list-style-type: none"> <li>*Physician's office</li> <li>*Independent nursing practice</li> <li>*Hospital based clinic</li> <li>*Community based clinic</li> <li>*Public health or ministry of health</li> <li>*Hospital</li> <li>*Home health care facility</li> <li>*Long term care facility</li> <li>*Specialty practice</li> <li>*Mental health</li> <li>*School health</li> <li>*Occupational or workplace health</li> <li>*Faculty position</li> <li>*Administration</li> <li>*Research</li> </ul> | <ul style="list-style-type: none"> <li>*Carries their own caseload of clients/patients</li> <li>*Has the authority to prescribe medications</li> <li>*Has the authority to dispense/furnish medications</li> <li>*Refers to other health care professionals</li> <li>*Seeks out consultation with other health professionals</li> <li>*Other professionals seek out consultations with the NP/APN</li> <li>*Receives payment for serviced from other sources (i.e., National Health Service [NHS] or insurance companies)</li> </ul>                                                                                                                                                                                                                                                                                                                                                 | <ul style="list-style-type: none"> <li>*Wound management</li> <li>*Splinting</li> <li>*Casting</li> <li>*Suturing</li> <li>*Pulmonary function tests and office spirometry</li> <li>*Pap tests</li> <li>*In-dwelling contraceptive management (IUDs) and/or long term hormonal implantation</li> <li>*12 lead ECG interpretation</li> <li>*Midwifery</li> <li>*Critical care/emergency acts (intubation, chest tube insertion/removal, central line insertion)</li> </ul>                                                                                                                                                                                                                                                                                                                                                                                                                                                                         |

|                |   |                                             |     |                                                                                                                                                                            |                                                                                                                                                                                                                                                                                                                                                                                                                                                                                                                     |                                                                                                                                                                                                                                                                                                 |
|----------------|---|---------------------------------------------|-----|----------------------------------------------------------------------------------------------------------------------------------------------------------------------------|---------------------------------------------------------------------------------------------------------------------------------------------------------------------------------------------------------------------------------------------------------------------------------------------------------------------------------------------------------------------------------------------------------------------------------------------------------------------------------------------------------------------|-------------------------------------------------------------------------------------------------------------------------------------------------------------------------------------------------------------------------------------------------------------------------------------------------|
|                |   |                                             |     |                                                                                                                                                                            | *Practices independently without physician supervision<br>*Practice activities for these types of NP/APN actions varies by jurisdiction                                                                                                                                                                                                                                                                                                                                                                             |                                                                                                                                                                                                                                                                                                 |
| <b>France</b>  | 4 | Nurse in Advanced Practice (for NP and CNS) | Yes | *Physician's office<br>*Hospital based clinic<br>*Community based clinic<br>*Hospital<br>*Specialty practice<br>*Research                                                  | *Carries their own caseload of clients/patients<br>*Has the authority to prescribe medications<br>*Has the authority to dispense/furnish medications<br>*Has the authority to order diagnostic tests<br>*Refers to other health care professionals<br>*Seeks out consultation with other health professionals<br>*Other professionals seek out consultations with the NP/APN<br>*Receives direct payments for services for clients<br>*Practice activities for these types of NP/APN actions varies by jurisdiction | *Therapeutic injections (such as for osteoporosis or rheumatoid arthritis)<br>*Pulmonary function tests and office spirometry                                                                                                                                                                   |
| <b>Germany</b> | 3 | Advanced Practice Nurse                     | No  | *Hospital based clinic<br>*Hospital<br>*Specialty practice<br>*Faculty position<br>*Administration<br>*Research                                                            | *Maintains personal liability/indemnity/malpractice insurance<br>*Carries their own caseload of clients/patients<br>*Seeks out consultation with other health professionals<br>*Other professionals seek out consultations with the NP/APN                                                                                                                                                                                                                                                                          | *Joint aspirations and injections<br>*Wound management<br>*Casting<br>*Pulmonary function tests and office spirometry<br>*12 lead ECG interpretation<br>*X-ray interpretation<br>*Midwifery<br>*Critical care/emergency acts (intubation, chest tube insertion/removal, central line insertion) |
| <b>Ghana</b>   | 3 | Nurse Practitioner                          | No  | *Physician's office<br>*Independent nursing practice<br>*Hospital based clinic<br>*Public health or ministry of health<br>*Hospital<br>*Mental health<br>*Faculty position | *Has the authority to prescribe medications,<br>*Has the authority to order diagnostic tests<br>*Refers to other health care professionals<br>*Seeks out consultation with other health professionals<br>*Other professionals seek out consultations with the NP/APN<br>*Receives payment for services from other sources (i.e., National Health Service [NHS] or insurance companies)<br>*Practice activities for these types of NP/APN actions varies by jurisdiction,                                            | *Skin lesion removal/skin biopsy/superficial abscess incision and drainage/foreign body removal<br>*Wound management<br>*Suturing<br>*X-ray interpretation<br>*Critical care/emergency acts (intubation, chest tube insertion/removal, central line insertion)                                  |
| <b>Hungary</b> | 1 | Nurse in Advanced Practice                  | Yes | *Other (first graduates just finished so unclear)                                                                                                                          | *Other (first graduates just finished so unclear)                                                                                                                                                                                                                                                                                                                                                                                                                                                                   | *Skin lesion removal/skin biopsy/superficial abscess incision and drainage/foreign body removal                                                                                                                                                                                                 |

|                    |    |                                                       |     |                                                                                                                                                                                                                                                |                                                                                                                                                                                                                                                                                                                                                                                                        |                                                                                                                                                                                                                                                                                                                                                                                                                                                                                                                                                                             |
|--------------------|----|-------------------------------------------------------|-----|------------------------------------------------------------------------------------------------------------------------------------------------------------------------------------------------------------------------------------------------|--------------------------------------------------------------------------------------------------------------------------------------------------------------------------------------------------------------------------------------------------------------------------------------------------------------------------------------------------------------------------------------------------------|-----------------------------------------------------------------------------------------------------------------------------------------------------------------------------------------------------------------------------------------------------------------------------------------------------------------------------------------------------------------------------------------------------------------------------------------------------------------------------------------------------------------------------------------------------------------------------|
|                    |    |                                                       |     |                                                                                                                                                                                                                                                |                                                                                                                                                                                                                                                                                                                                                                                                        | <ul style="list-style-type: none"> <li>*Nail removal</li> <li>*Cerumen removal</li> <li>*Joint aspirations and injections</li> <li>*Wound management</li> <li>*Surgical debridement</li> <li>*Splinting</li> <li>*Casting</li> <li>*Suturing</li> <li>*Pulmonary function tests and office spirometry</li> <li>*Pap tests</li> <li>*12 lead ECG interpretation</li> <li>*X-ray interpretation</li> <li>*Critical care/emergency acts (intubation, chest tube insertion/removal, central line insertion)</li> <li>*Nerve blocks</li> <li>*Sedation for procedures</li> </ul> |
| <b>Israel</b>      | 1  | Expert Nurse                                          | Yes | *Specialty practice                                                                                                                                                                                                                            | *No evidence                                                                                                                                                                                                                                                                                                                                                                                           | *Midwifery                                                                                                                                                                                                                                                                                                                                                                                                                                                                                                                                                                  |
| <b>Italy</b>       | 1  | No specific title                                     | No  | <ul style="list-style-type: none"> <li>*Independent nursing practice</li> <li>*Hospital based clinic</li> <li>*Community based clinic</li> <li>*Long term care facility</li> <li>*Faculty position</li> <li>*Research</li> </ul>               | <ul style="list-style-type: none"> <li>*Maintains personal liability/indemnity/malpractice insurance</li> <li>*Refers to other health care professionals</li> <li>*Seeks out consultation with other health professionals</li> <li>*Other professionals seek out consultations with the NP/APN</li> </ul>                                                                                              | <ul style="list-style-type: none"> <li>*Skin lesion removal/skin biopsy/superficial abscess incision and drainage/foreign body removal</li> <li>*Nail removal</li> <li>*Cerumen removal</li> <li>*Fluorescein stain to eye</li> <li>*Joint aspirations and injections</li> <li>*Wound management</li> <li>*Surgical debridement</li> <li>*Splinting</li> <li>*Casting</li> <li>*Suturing</li> <li>*Pulmonary function tests and office spirometry</li> <li>mmm=pap tests</li> <li>*12 lead ECG interpretation</li> </ul>                                                    |
| <b>Jamaica</b>     | 1  | Nurse Practitioner                                    | Yes | <ul style="list-style-type: none"> <li>*Public health or ministry of health</li> <li>*Hospital</li> <li>*Specialty practice</li> <li>*Mental health</li> <li>*Faculty position</li> </ul>                                                      | <ul style="list-style-type: none"> <li>*Carries their own caseload of clients/patients</li> <li>*Has the authority to prescribe medications</li> <li>*Has the authority to order diagnostic tests</li> <li>*Refers to other health care professionals</li> <li>*Seeks out consultation with other health professionals</li> <li>*Other professionals seek out consultations with the NP/APN</li> </ul> | <ul style="list-style-type: none"> <li>*Cerumen removal</li> <li>*Wound management</li> <li>*Pap tests</li> <li>*In-dwelling contraceptive management (IUDs) and/or long term hormonal implantation</li> <li>*X-ray interpretation</li> <li>*Midwifery</li> </ul>                                                                                                                                                                                                                                                                                                           |
| <b>Kenya</b>       | 2  | Nurse Specialist                                      | No  | <ul style="list-style-type: none"> <li>*Specialty practice</li> <li>*Faculty position</li> <li>*Administration</li> <li>*Research</li> </ul>                                                                                                   | <ul style="list-style-type: none"> <li>*Refers to other health care professionals</li> <li>*Seeks out consultation with other health professionals</li> </ul>                                                                                                                                                                                                                                          | <ul style="list-style-type: none"> <li>*Pap tests</li> <li>*In-dwelling contraceptive management (IUDs) and/or long term hormonal implantation</li> <li>*Midwifery</li> <li>*Sedation for procedures</li> </ul>                                                                                                                                                                                                                                                                                                                                                             |
| <b>Netherlands</b> | 39 | Master in Advanced Nursing Practice, Nurse Specialist | Yes | <ul style="list-style-type: none"> <li>*Physician's office</li> <li>*Independent nursing practice</li> <li>*Hospital based clinic</li> <li>*Community based clinic</li> <li>*Public health or ministry of health</li> <li>*Hospital</li> </ul> | <ul style="list-style-type: none"> <li>*Maintains personal liability/indemnity/malpractice insurance</li> <li>*Carries their own caseload of clients/patients</li> <li>*Has the authority to prescribe medications</li> <li>*Has the authority to</li> </ul>                                                                                                                                           | <ul style="list-style-type: none"> <li>*Skin lesion removal/skin biopsy/superficial abscess incision and drainage/foreign body removal</li> <li>*Nail removal</li> <li>*Cerumen removal</li> <li>*Fluorescein stain to eye</li> <li>*Joint aspirations and injections</li> </ul>                                                                                                                                                                                                                                                                                            |

|                    |   |                                       |     |                                                                                                                                                                                                                                                                                                                                                                                                                                                                                                                     |                                                                                                                                                                                                                                                                                                                                                                                                                                                                                                                                                                                                                                                                                                                                                                                                                                                                                      |                                                                                                                                                                                                                                                                                                                                                                                                                                                                                                                                                                                                                                                                                                                                                                                                                                                                                                 |
|--------------------|---|---------------------------------------|-----|---------------------------------------------------------------------------------------------------------------------------------------------------------------------------------------------------------------------------------------------------------------------------------------------------------------------------------------------------------------------------------------------------------------------------------------------------------------------------------------------------------------------|--------------------------------------------------------------------------------------------------------------------------------------------------------------------------------------------------------------------------------------------------------------------------------------------------------------------------------------------------------------------------------------------------------------------------------------------------------------------------------------------------------------------------------------------------------------------------------------------------------------------------------------------------------------------------------------------------------------------------------------------------------------------------------------------------------------------------------------------------------------------------------------|-------------------------------------------------------------------------------------------------------------------------------------------------------------------------------------------------------------------------------------------------------------------------------------------------------------------------------------------------------------------------------------------------------------------------------------------------------------------------------------------------------------------------------------------------------------------------------------------------------------------------------------------------------------------------------------------------------------------------------------------------------------------------------------------------------------------------------------------------------------------------------------------------|
|                    |   |                                       |     | <ul style="list-style-type: none"> <li>*Home health care facility</li> <li>*Long term care facility</li> <li>*Specialty practice</li> <li>*Mental health</li> <li>*School health</li> <li>*Occupational or workplace health</li> <li>*Faculty position</li> <li>*Administration,</li> <li>*Research</li> <li>*Other (EMS, prehospital care)</li> </ul>                                                                                                                                                              | <ul style="list-style-type: none"> <li>dispense/furnish medications</li> <li>*Has the authority to order diagnostic tests</li> <li>*Refers to other health care professionals</li> <li>*Seeks out consultation with other health professionals</li> <li>*Other professionals seek out consultations with the NP/APN</li> <li>*Receives direct payments for services for clients</li> <li>*Receives payment for serviced from other sources (i.e., National Health Service [NHS] or insurance companies)</li> <li>*Practices independently without physician supervision</li> <li>*Practice activities for these types of NP/APN actions varies by jurisdiction</li> </ul>                                                                                                                                                                                                            | <ul style="list-style-type: none"> <li>*Therapeutic injections (such as for osteoporosis or rheumatoid arthritis)</li> <li>*Wound management</li> <li>*Surgical debridement</li> <li>*Splinting</li> <li>*Casting</li> <li>*Suturing</li> <li>*Pulmonary function tests and office spirometry</li> <li>*Pap tests</li> <li>*In-dwelling contraceptive management (IUDs) and/or long term hormonal implantation</li> <li>*Microscopy</li> <li>*12 lead ECG interpretation</li> <li>*X-ray interpretation</li> <li>*Midwifery</li> <li>*Critical care/emergency acts (intubation, chest tube insertion/removal, central line insertion)</li> <li>*Nerve blocks</li> <li>*Sedation for procedures</li> </ul>                                                                                                                                                                                       |
| <b>New Zealand</b> | 4 | Nurse Practitioner                    | Yes | <ul style="list-style-type: none"> <li>*Physician's office</li> <li>*Independent nursing practice</li> <li>*Hospital based clinic</li> <li>*Community based clinic</li> <li>*Public health or ministry of health</li> <li>*Hospital</li> <li>*Home health care facility</li> <li>*Long term care facility</li> <li>*Specialty practice</li> <li>*Mental health</li> <li>*School health</li> <li>*Occupational or workplace health</li> <li>*Faculty position</li> <li>*Administration</li> <li>*Research</li> </ul> | <ul style="list-style-type: none"> <li>*Maintains personal liability/indemnity/malpractice insurance</li> <li>*Carries their own caseload of clients/patients</li> <li>*Has the authority to prescribe medications</li> <li>*Has the authority to dispense/furnish medications</li> <li>*Has the authority to order diagnostic tests</li> <li>*Refers to other health care professionals</li> <li>*Seeks out consultation with other health professionals</li> <li>*Other professionals seek out consultations with the NP/APN</li> <li>*Receives direct payments for services for clients</li> <li>*Receives payment for serviced from other sources (i.e., National Health Service [NHS] or insurance companies)</li> <li>*Practices independently without physician supervision</li> <li>*Practice activities for these types of NP/APN actions varies by jurisdiction</li> </ul> | <ul style="list-style-type: none"> <li>*Skin lesion removal/skin biopsy/superficial abscess incision and drainage/foreign body removal</li> <li>*Nail removal</li> <li>*Cerumen removal</li> <li>*Fluorescein stain to eye</li> <li>*Joint aspirations and injections</li> <li>*Therapeutic injections (such as for osteoporosis or rheumatoid arthritis)</li> <li>*Wound management</li> <li>*Surgical debridement</li> <li>*Splinting</li> <li>*Casting</li> <li>*Suturing</li> <li>*Pulmonary function tests and office spirometry</li> <li>*Pap tests</li> <li>*In-dwelling contraceptive management (IUDs) and/or long term hormonal implantation</li> <li>*12 lead ECG interpretation</li> <li>*X-ray interpretation</li> <li>*Critical care/emergency acts (intubation, chest tube insertion/removal, central line insertion)</li> <li>*Nerve blocks *Sedation for procedures</li> </ul> |
| <b>Portugal</b>    | 3 | Clinical Specialist, Specialist Nurse | Yes | <ul style="list-style-type: none"> <li>*Physician's office</li> <li>*Independent nursing practice</li> <li>*Hospital based clinic</li> <li>*Community based clinic</li> <li>*Public health or</li> </ul>                                                                                                                                                                                                                                                                                                            | <ul style="list-style-type: none"> <li>*Refers to other health care professionals</li> <li>*Seeks out consultation with other health professionals</li> <li>*Other professionals seek out consultations</li> </ul>                                                                                                                                                                                                                                                                                                                                                                                                                                                                                                                                                                                                                                                                   | <ul style="list-style-type: none"> <li>*Skin lesion removal/skin biopsy/superficial abscess incision and drainage/foreign body removal</li> <li>*Cerumen removal</li> <li>*Wound management</li> <li>*Splinting</li> </ul>                                                                                                                                                                                                                                                                                                                                                                                                                                                                                                                                                                                                                                                                      |

|                            |   |                                                                                                                                                                                   |     |                                                                                                                                                                                                                                                                                                                                                                                                                                                  |                                                                                                                                                                                                                                                                                                                                                                                                                                                                                                                                                                                                                                                                                                                                    |                                                                                                                                                                                                                                                                                                                                                                                                                                                                                                                                                                                                                                                                                                                                                                                                                                                                                                                              |
|----------------------------|---|-----------------------------------------------------------------------------------------------------------------------------------------------------------------------------------|-----|--------------------------------------------------------------------------------------------------------------------------------------------------------------------------------------------------------------------------------------------------------------------------------------------------------------------------------------------------------------------------------------------------------------------------------------------------|------------------------------------------------------------------------------------------------------------------------------------------------------------------------------------------------------------------------------------------------------------------------------------------------------------------------------------------------------------------------------------------------------------------------------------------------------------------------------------------------------------------------------------------------------------------------------------------------------------------------------------------------------------------------------------------------------------------------------------|------------------------------------------------------------------------------------------------------------------------------------------------------------------------------------------------------------------------------------------------------------------------------------------------------------------------------------------------------------------------------------------------------------------------------------------------------------------------------------------------------------------------------------------------------------------------------------------------------------------------------------------------------------------------------------------------------------------------------------------------------------------------------------------------------------------------------------------------------------------------------------------------------------------------------|
|                            |   |                                                                                                                                                                                   |     | <ul style="list-style-type: none"> <li>ministry of health</li> <li>*Hospital</li> <li>*Home health care facility</li> <li>*Long term care facility</li> <li>*Specialty practice</li> <li>*Mental health</li> <li>*School health</li> <li>*Faculty position</li> <li>*Administration</li> <li>*Research</li> </ul>                                                                                                                                | <ul style="list-style-type: none"> <li>with the NP/APN</li> <li>*Receives payment for serviced from other sources (i.e., National Health Service [NHS] or insurance companies)</li> <li>*Practices independently without physician supervision</li> </ul>                                                                                                                                                                                                                                                                                                                                                                                                                                                                          | <ul style="list-style-type: none"> <li>*Casting</li> <li>*Suturing</li> <li>*Pap tests</li> <li>*X-ray interpretation</li> <li>*Midwifery</li> <li>*Critical care/emergency acts (intubation, chest tube insertion/removal, central line insertion)</li> </ul>                                                                                                                                                                                                                                                                                                                                                                                                                                                                                                                                                                                                                                                               |
| <b>Republic of Ireland</b> | 5 | <ul style="list-style-type: none"> <li>Advanced Nurse Practitioner, Registered</li> <li>Advanced Nurse Practitioner, Registered</li> <li>Advanced Midwife Practitioner</li> </ul> | Yes | <ul style="list-style-type: none"> <li>*Physician's office</li> <li>*Independent nursing practice</li> <li>*Hospital based clinic</li> <li>*Community based clinic</li> <li>*Public health or ministry of health</li> <li>*Hospital</li> <li>*Home health care facility</li> <li>*Long term care facility</li> <li>*Specialty practice</li> <li>*Mental health</li> <li>*Faculty position</li> <li>*Administration</li> <li>*Research</li> </ul> | <ul style="list-style-type: none"> <li>*Maintains personal liability/indemnity/malpractice insurance</li> <li>*Carries their own caseload of clients/patients</li> <li>*Has the authority to prescribe medications</li> <li>*Has the authority to dispense/furnish medications</li> <li>*Has the authority to order diagnostic tests</li> <li>*Refers to other health care professionals,</li> <li>*Seeks out consultation with other health professionals</li> <li>*Other professionals seek out consultations with the NP/APN</li> <li>*Receives payment for serviced from other sources (i.e., National Health Service [NHS] or insurance companies)</li> <li>*Practices independently without physician supervision</li> </ul> | <ul style="list-style-type: none"> <li>*Skin lesion removal/skin biopsy/superficial abscess incision and drainage/foreign body removal</li> <li>*Nail removal</li> <li>*Cerumen removal</li> <li>*Fluorescein stain to eye</li> <li>*Joint aspirations and injections</li> <li>*Therapeutic injections (such as for osteoporosis or rheumatoid arthritis)</li> <li>*Wound management</li> <li>*Surgical debridement</li> <li>*Splinting</li> <li>*Casting</li> <li>*Suturing</li> <li>*Pulmonary function tests and office spirometry</li> <li>*Pap tests</li> <li>*In-dwelling contraceptive management (IUDs) and/or long term hormonal implantation</li> <li>*12 lead ECG interpretation</li> <li>*X-ray interpretation</li> <li>*Midwifery</li> <li>*Critical care/emergency acts (intubation, chest tube insertion/removal, central line insertion)</li> <li>*Nerve blocks</li> <li>*Sedation for procedures</li> </ul> |
| <b>Singapore</b>           | 3 | <ul style="list-style-type: none"> <li>Advanced Practice Nurse</li> </ul>                                                                                                         | Yes | <ul style="list-style-type: none"> <li>*Hospital based clinic</li> <li>*Community based clinic</li> <li>*Hospital</li> <li>*Home health care facility</li> <li>*Long term care facility</li> <li>*Specialty practice</li> <li>*Mental health</li> <li>*Faculty position</li> <li>*Administration</li> </ul>                                                                                                                                      | <ul style="list-style-type: none"> <li>*Carries their own caseload of clients/patients</li> <li>*Has the authority to prescribe medications</li> <li>*Has the authority to dispense/furnish medications</li> <li>*Has the authority to order diagnostic tests</li> <li>*Refers to other health care professionals</li> <li>*Seeks out consultation with other health professionals</li> <li>*Other professionals seek out consultations with the NP/APN</li> <li>*Receives direct payments for services for clients</li> <li>*Receives payment for serviced from other sources (i.e., National Health Service [NHS])</li> </ul>                                                                                                    | <ul style="list-style-type: none"> <li>*Skin lesion removal/skin biopsy/superficial abscess incision and drainage/foreign body removal</li> <li>*Wound management</li> <li>*Surgical debridement</li> <li>*Splinting</li> <li>*Casting</li> <li>*Suturing</li> <li>*Pap tests</li> <li>*12 lead ECG interpretation</li> <li>*In-dwelling contraceptive management (IUDs) and/or long term hormonal implantation</li> <li>*X-ray interpretation</li> <li>*Critical care/emergency acts (intubation, chest tube insertion/removal, central line insertion)</li> </ul>                                                                                                                                                                                                                                                                                                                                                          |

|                       |    |                                                                                |    |                                                                                                                                                                                                                                                                                                                                                                               |                                                                                                                                                                                                                                                                                                                                                                                                                                                                                                                                                                                          |                                                                                                                                                                                                                                                                                                                                                                                                                                                                                                                                                                                                                                                                                                                                                                         |
|-----------------------|----|--------------------------------------------------------------------------------|----|-------------------------------------------------------------------------------------------------------------------------------------------------------------------------------------------------------------------------------------------------------------------------------------------------------------------------------------------------------------------------------|------------------------------------------------------------------------------------------------------------------------------------------------------------------------------------------------------------------------------------------------------------------------------------------------------------------------------------------------------------------------------------------------------------------------------------------------------------------------------------------------------------------------------------------------------------------------------------------|-------------------------------------------------------------------------------------------------------------------------------------------------------------------------------------------------------------------------------------------------------------------------------------------------------------------------------------------------------------------------------------------------------------------------------------------------------------------------------------------------------------------------------------------------------------------------------------------------------------------------------------------------------------------------------------------------------------------------------------------------------------------------|
|                       |    |                                                                                |    |                                                                                                                                                                                                                                                                                                                                                                               | or insurance companies)<br>*Practices independently without physician supervision<br>*Practice activities for these types of NP/APN actions varies by jurisdiction                                                                                                                                                                                                                                                                                                                                                                                                                       |                                                                                                                                                                                                                                                                                                                                                                                                                                                                                                                                                                                                                                                                                                                                                                         |
| <b>Spain</b>          | 10 | Nurse in Advanced Practice, Nurse Case Manager, Expert Nurse, Specialist Nurse | No | *Physician's office<br>*Independent nursing practice<br>*Hospital based clinic<br>*Community based clinic<br>*Public health or ministry of health<br>*Hospital<br>*Home health care facility<br>*Long term care facility<br>*Specialty practice<br>*Mental health<br>*School health<br>*Occupational or workplace health<br>*Faculty position<br>*Administration<br>*Research | *Maintains personal liability/indemnity/malpractice insurance<br>*Carries their own caseload of clients/patients, cc=has the authority to prescribe medications<br>*Has the authority to dispense/furnish medications<br>*Has the authority to order diagnostic tests<br>*Refers to other health care professionals<br>*Seeks out consultation with other health professionals<br>*Other professionals seek out consultations with the NP/APN<br>*Practices independently without physician supervision<br>*Practice activities for these types of NP/APN actions varies by jurisdiction | *Skin lesion removal/skin biopsy/superficial abscess incision and drainage/foreign body removal<br>*Nail removal<br>*Cerumen removal<br>*Fluorescein stain to eye<br>*Joint aspirations and injections<br>*Therapeutic injections (such as for osteoporosis or rheumatoid arthritis)<br>*Wound management<br>*Surgical debridement<br>*Splinting<br>*Casting<br>*Suturing<br>*Pulmonary function tests and office spirometry<br>*Pap tests<br>*In-dwelling contraceptive management (IUDs) and/or long term hormonal implantation<br>*Microscopy<br>*12 lead ECG interpretation<br>*X-ray interpretation<br>*Midwifery<br>*Critical care/emergency acts (intubation, chest tube insertion/removal, central line insertion)<br>*Nerve blocks<br>*Sedation for procedures |
| <b>Tanzania</b>       | 1  | No specific title                                                              | No | *Hospital based clinic<br>*Public health or ministry of health<br>*Hospital<br>*Faculty position<br>*Administration<br>*Research                                                                                                                                                                                                                                              | *Other professionals seek out consultations with the NP/APN                                                                                                                                                                                                                                                                                                                                                                                                                                                                                                                              | *No evidence                                                                                                                                                                                                                                                                                                                                                                                                                                                                                                                                                                                                                                                                                                                                                            |
| <b>United Kingdom</b> | 41 | Multiple                                                                       | No | *Physician's office<br>*Independent nursing practice<br>*Hospital based clinic<br>*Community based clinic<br>*Public health or ministry of health<br>*Hospital<br>*Home health care facility<br>*Long term care facility<br>*Specialty practice<br>*Mental health<br>*School health<br>*Occupational or workplace health<br>*Faculty position<br>*Administration<br>*Research | *Maintains personal liability/indemnity/malpractice insurance<br>*Carries their own caseload of clients/patients<br>*Has the authority to prescribe medications<br>*Has the authority to dispense/furnish medications<br>*Has the authority to order diagnostic tests<br>*Refers to other health care professionals<br>*Seeks out consultation with other health professionals<br>*Other professionals seek out consultations with the NP/APN                                                                                                                                            | *Skin lesion removal/skin biopsy/superficial abscess incision and drainage/foreign body removal<br>*Nail removal<br>*Cerumen removal<br>*Fluorescein stain to eye<br>*Joint aspirations and injections<br>*Therapeutic injections (such as for osteoporosis or rheumatoid arthritis)<br>*Wound management<br>*Surgical debridement<br>*Splinting<br>*Casting<br>*Suturing<br>*Pulmonary function tests and office spirometry<br>*Pap tests<br>*In-dwelling contraceptive                                                                                                                                                                                                                                                                                                |

|                      |     |                                                                                                                       |     |                                                                                                                                                                                                                                                                                                                                                                               |                                                                                                                                                                                                                                                                                                                                                                                                                                                                                                                                                                                                                                                                                                                                                                  |                                                                                                                                                                                                                                                                                                                                                                                                                                                                                                                                                                                                                                                                                                                                                                         |
|----------------------|-----|-----------------------------------------------------------------------------------------------------------------------|-----|-------------------------------------------------------------------------------------------------------------------------------------------------------------------------------------------------------------------------------------------------------------------------------------------------------------------------------------------------------------------------------|------------------------------------------------------------------------------------------------------------------------------------------------------------------------------------------------------------------------------------------------------------------------------------------------------------------------------------------------------------------------------------------------------------------------------------------------------------------------------------------------------------------------------------------------------------------------------------------------------------------------------------------------------------------------------------------------------------------------------------------------------------------|-------------------------------------------------------------------------------------------------------------------------------------------------------------------------------------------------------------------------------------------------------------------------------------------------------------------------------------------------------------------------------------------------------------------------------------------------------------------------------------------------------------------------------------------------------------------------------------------------------------------------------------------------------------------------------------------------------------------------------------------------------------------------|
|                      |     |                                                                                                                       |     | *Other (transport services)                                                                                                                                                                                                                                                                                                                                                   | *Receives direct payments for services for clients<br>*Receives payment for serviced from other sources (i.e., National Health Service [NHS] or insurance companies)<br>*Practices independently without physician supervision<br>*Practice activities for these types of NP/APN actions varies by jurisdiction                                                                                                                                                                                                                                                                                                                                                                                                                                                  | management (IUDs) and/or long term hormonal implantation<br>*Microscopy<br>*12 lead ECG interpretation<br>*X-ray interpretation<br>*Midwifery<br>*Critical care/emergency acts (intubation, chest tube insertion/removal, central line insertion)<br>*Nerve blocks<br>*Sedation for procedures                                                                                                                                                                                                                                                                                                                                                                                                                                                                          |
| <b>United States</b> | 103 | APRN (Nurse Practitioner, Clinical Nurse Specialist, Certified Nurse Midwife, Certified Registered Nurse Anesthetist) | Yes | *Physician's office<br>*Independent nursing practice<br>*Hospital based clinic<br>*Community based clinic<br>*Public health or ministry of health<br>*Hospital<br>*Home health care facility<br>*Long term care facility<br>*Specialty practice<br>*Mental health<br>*School health<br>*Occupational or workplace health<br>*Faculty position<br>*Administration<br>*Research | *Maintains personal liability/indemnity/malpractice insurance<br>*Carries their own caseload of clients/patients<br>*Has the authority to prescribe medications<br>*Has the authority to dispense/furnish medications<br>*Has the authority to order diagnostic tests<br>*Refers to other health care professionals<br>*Seeks out consultation with other health professionals<br>*Other professionals seek out consultations with the NP/APN<br>*Receives direct payments for services for clients<br>*Receives payment for serviced from other sources (i.e., National Health Service [NHS] or insurance companies)<br>*Practices independently without physician supervision<br>*Practice activities for these types of NP/APN actions varies by jurisdiction | *Skin lesion removal/skin biopsy/superficial abscess incision and drainage/foreign body removal<br>*Nail removal<br>*Cerumen removal<br>*Fluorescein stain to eye<br>*Joint aspirations and injections<br>*Therapeutic injections (such as for osteoporosis or rheumatoid arthritis)<br>*Wound management<br>*Surgical debridement<br>*Splinting<br>*Casting<br>*Suturing<br>*Pulmonary function tests and office spirometry<br>*Pap tests<br>*In-dwelling contraceptive management (IUDs) and/or long term hormonal implantation<br>*Microscopy<br>*12 lead ECG interpretation<br>*X-ray interpretation<br>*Midwifery<br>*Critical care/emergency acts (intubation, chest tube insertion/removal, central line insertion)<br>*Nerve blocks<br>*Sedation for procedures |

Low response countries in shaded gray

## Appendix B. Practice Climate

| Country          | n | Factors That Facilitated NP/APN Development                                                                                                                    | Who Advocated                                                                                                                                     | Who Opposed                                                                             | Level of NP/APN Policy Making | Level of NP/APN Organization Development |
|------------------|---|----------------------------------------------------------------------------------------------------------------------------------------------------------------|---------------------------------------------------------------------------------------------------------------------------------------------------|-----------------------------------------------------------------------------------------|-------------------------------|------------------------------------------|
| <b>Australia</b> | 5 | *Need for health care providers for rural or underserved areas<br>*Strong support for nursing practice<br>*Consumer demand for increased access to health care | *Government<br>*Nursing organizations within country<br>*International organization<br>*Individual nurses<br>*Individual physicians<br>*Consumers | *Physician organizations within country<br>*Individual nurses<br>*Individual physicians | *Local<br>*National           | *Local<br>*National                      |



|                                                           |    |                                                                                                                                                                                                                                                                    |                                                                                                                                                                                                                                                                                                                            |                                                                                                                                                                                                                                                                                                    |                     |                     |
|-----------------------------------------------------------|----|--------------------------------------------------------------------------------------------------------------------------------------------------------------------------------------------------------------------------------------------------------------------|----------------------------------------------------------------------------------------------------------------------------------------------------------------------------------------------------------------------------------------------------------------------------------------------------------------------------|----------------------------------------------------------------------------------------------------------------------------------------------------------------------------------------------------------------------------------------------------------------------------------------------------|---------------------|---------------------|
| <b>Botswana</b>                                           | 2  | *Need for health care providers for rural or underserved areas<br>*Strong support for nursing practice<br>*Consumer demand for increased access to health care<br>*Shortage of physicians                                                                          | *Government organizations within country<br>*Nursing organizations within country<br>*Individual nurses<br>*Consumers                                                                                                                                                                                                      | *No evidence                                                                                                                                                                                                                                                                                       | *Local<br>*National | *Local<br>*National |
| <b>Canada</b>                                             | 85 | *Need for health care providers for rural or underserved areas<br>*Strong support for nursing practice<br>*Consumer demand for increased access to health care<br>*Shortage of physicians (one respondent cited physician shortage was in neonatal ICUs initially) | *Government organizations within country<br>*Nursing organizations within country<br>*Physician organizations within country<br>*Nongovernmental/n onprofit institution within country<br>*Private institution within country<br>*International organization<br>*Individual nurses<br>*Individual physicians<br>*Consumers | *Government organizations within country<br>*Physician organizations within country<br>*Nongovernmental/ nonprofit institution within country<br>*Private institution within country<br>*Individual nurses<br>*Individual physicians<br>*Consumers<br>*Insurance companies<br>*Other (pharmacists) | *Local<br>*National | *Local<br>*National |
| <b>Chile</b>                                              | 3  | *Need for health care providers for rural or underserved areas<br>*Strong support for nursing practice<br>*Consumer demand for increased access to health care                                                                                                     | *Nursing organizations within country<br>*Private institution within country<br>*University                                                                                                                                                                                                                                | *Physician organizations within country<br>*Other (unawareness of role)                                                                                                                                                                                                                            | *No evidence        | *National           |
| <b>Ecuador (role not established outside US agencies)</b> | 1  | No evidence                                                                                                                                                                                                                                                        | *Other (one university interested)                                                                                                                                                                                                                                                                                         | *Government organizations within country<br>*Nursing organizations within country<br>*Physician organizations within country<br>*Nongovernmental/ nonprofit institution within country<br>*Individual nurses<br>*Individual physicians<br>*Insurance companies                                     | No evidence         | No evidence         |
| <b>Finland</b>                                            | 4  | *Need for health care providers for rural or underserved areas<br>*Strong support for nursing practice<br>*Consumer demand for increased access to health care                                                                                                     | *Government organizations within country<br>*Nursing organizations within country<br>*Nongovernmental/ nonprofit institution within country<br>*International organization<br>*Individual nurses<br>*Individual physicians<br>*Other (educators, researchers)                                                              | *Physician organizations within country<br>*Individual nurses<br>*Individual physicians                                                                                                                                                                                                            | *Local<br>*National | *Local<br>*National |
| <b>France</b>                                             | 4  | *Need for health care providers for rural or underserved areas<br>*Strong support for                                                                                                                                                                              | *Government organizations within country<br>*Nursing organizations within country<br>*Physician                                                                                                                                                                                                                            | *Government organizations within country<br>*Nursing organizations within country<br>*Physician                                                                                                                                                                                                    | No evidence         | *Local              |

|                    |    |                                                                                                                                                                                                                                                                            |                                                                                                                                                                                                                                                                                   |                                                                                                                                                                                                                                                                                                               |                     |                     |
|--------------------|----|----------------------------------------------------------------------------------------------------------------------------------------------------------------------------------------------------------------------------------------------------------------------------|-----------------------------------------------------------------------------------------------------------------------------------------------------------------------------------------------------------------------------------------------------------------------------------|---------------------------------------------------------------------------------------------------------------------------------------------------------------------------------------------------------------------------------------------------------------------------------------------------------------|---------------------|---------------------|
|                    |    | nursing practice<br>*Consumer demand for increased access to health care                                                                                                                                                                                                   | organizations within country<br>*Individual nurses<br>*Individual physicians                                                                                                                                                                                                      | organizations within country<br>*Individual nurses<br>*Individual physicians<br>*Insurance companies                                                                                                                                                                                                          |                     |                     |
| <b>Germany</b>     | 3  | *Need for health care providers for rural or underserved areas<br>*Strong support for nursing practice                                                                                                                                                                     | *Government organizations within country<br>*Nursing organizations within country<br>*Physician organizations within country<br>*Other (specifically nursing administration in hospitals)                                                                                         | *Government organizations within country<br>*Nursing organizations within country<br>*Physician organizations within country<br>*Nongovernmental/nonprofit institution within country<br>*Individual nurses<br>*Individual physicians<br>*Insurance companies<br>*Other (physician organizations favored PAs) | *Local<br>*National | *Local<br>*National |
| <b>Ghana</b>       | 3  | *Need for health care providers for rural or underserved areas<br>*Strong support for nursing practice<br>*Consumer demand for increased access to health care                                                                                                             | *Government organizations within country<br>*Nursing organizations within country<br>*Individual nurses<br>*Consumers<br>*Other (one university)                                                                                                                                  | *Physician organizations within country<br>*Individual physicians                                                                                                                                                                                                                                             | *Local<br>*National | *Local              |
| <b>Hungary</b>     | 1  | *Need for health care providers for rural or underserved areas<br>*Strong support for nursing practice<br>*Consumer demand for increased access to health care                                                                                                             | *University                                                                                                                                                                                                                                                                       | *Physician organizations within country                                                                                                                                                                                                                                                                       | *Local<br>*National | *No evidence        |
| <b>Israel</b>      | 1  | *No response                                                                                                                                                                                                                                                               | *No response                                                                                                                                                                                                                                                                      | *No response                                                                                                                                                                                                                                                                                                  | *No response        | *No response        |
| <b>Italy</b>       | 1  | *Strong support for nursing practice                                                                                                                                                                                                                                       | *International organization                                                                                                                                                                                                                                                       | *Government                                                                                                                                                                                                                                                                                                   | *National           | *Local<br>*National |
| <b>Jamaica</b>     | 1  | *Need for health care providers for rural or underserved areas<br>*Consumer demand for increased access to health care                                                                                                                                                     | *Government organizations within country<br>*Nursing organizations within country<br>*International organization.                                                                                                                                                                 | *Physician organizations within country                                                                                                                                                                                                                                                                       | *Local              | *Local<br>*National |
| <b>Kenya</b>       | 2  | *Other (to train more nurses in universities)                                                                                                                                                                                                                              | *Nursing organizations within country<br>*Individual nurses                                                                                                                                                                                                                       | No evidence                                                                                                                                                                                                                                                                                                   | *Local<br>*National | *Local<br>*National |
| <b>Netherlands</b> | 39 | *Need for health care providers for rural or underserved areas<br>*Strong support for nursing practice<br>*Consumer demand for increased access to health care<br>*Shortage of physicians (one respondent cited physician shortage was in psychiatry)<br>*Respondent cited | *Government organizations within country<br>*Nursing organizations within country<br>*Physician organizations within country<br>*Nongovernmental/nonprofit institution within country<br>*Private institution within country<br>*International organization<br>*Individual nurses | *Government organizations within country<br>*Nursing organizations within country<br>*Physician organizations within country<br>*Nongovernmental/nonprofit institution within country<br>*Individual nurses<br>*Individual physicians<br>*Consumers<br>*Insurance companies<br>*Other                         | *Local<br>*National | *Local<br>*National |

|                            |    |                                                                                                                                                                                                                                                            |                                                                                                                                                                                                                        |                                                                                                                                                                                                                |                     |                     |
|----------------------------|----|------------------------------------------------------------------------------------------------------------------------------------------------------------------------------------------------------------------------------------------------------------|------------------------------------------------------------------------------------------------------------------------------------------------------------------------------------------------------------------------|----------------------------------------------------------------------------------------------------------------------------------------------------------------------------------------------------------------|---------------------|---------------------|
|                            |    | dialogue about providing right (high quality) care in the most (cost) efficient way, as well as patient needs moving from 'illness and cure' to 'health and behavior'                                                                                      | *Individual physicians<br>*Insurance companies<br>*University                                                                                                                                                          | (psychiatry/psychology)                                                                                                                                                                                        |                     |                     |
| <b>New Zealand</b>         | 4  | *Need for health care providers for rural or underserved areas<br>*Strong support for nursing practice<br>*Consumer demand for increased access to health care                                                                                             | *Government<br>*Nursing organizations within country<br>*International organization<br>*Individual nurses<br>*Individual physicians                                                                                    | *Physician organizations within country<br>*Individual nurses<br>*Individual physicians                                                                                                                        | *Local<br>*National | *Local<br>*National |
| <b>Portugal</b>            | 3  | *Consumer demand for increased access to health care<br>*University                                                                                                                                                                                        | *Nursing organizations within country<br>*Individual nurses<br>*Other (PhD researchers)                                                                                                                                | *Government<br>*Physician organization within your country<br>*Individual physicians                                                                                                                           | *No evidence        | *Local<br>*National |
| <b>Republic of Ireland</b> | 5  | *Need for health care providers for rural or underserved areas<br>*Strong support for nursing practice<br>*Consumer demand for increased access to health care<br>*Other (One respondent cited commission to study nursing and developed pathway for APNs) | *Government<br>*Nursing organizations within country<br>*Physician organizations within country<br>*Nongovernmental/nonprofit institution within country<br>*Individual nurses<br>*Individual physicians<br>*Consumers | *Individual nurses<br>*Individual physicians                                                                                                                                                                   | *Local<br>*National | *Local<br>*National |
| <b>Singapore</b>           | 3  | *Need for health care providers for rural or underserved areas<br>*Strong support for nursing practice<br>*Consumer demand for increased access to health care                                                                                             | *Government<br>*Nursing organizations within country<br>*Physician organization within your country<br>*International organization<br>*Individual nurses<br>*Individual physicians<br>*Consumers                       | *Individual nurses<br>*Individual physicians                                                                                                                                                                   | *Local<br>*National | *Local<br>*National |
| <b>Spain</b>               | 10 | *Strong support for nursing practice<br>*Consumer demand for increased access to health care                                                                                                                                                               | *Nursing organizations within country<br>*Nongovernmental/nonprofit institution within country<br>*Individual nurses<br>*Individual physicians<br>*Consumers                                                           | *Government<br>*Nursing organizations within country<br>*Physician organizations within country<br>*Private institution within country<br>*Individual nurses<br>*Individual physicians<br>*Insurance companies | *Local<br>*National | *Local<br>*National |
| <b>Tanzania</b>            | 1  | *Strong support for nursing practice                                                                                                                                                                                                                       | *Government<br>*Nursing organizations within country<br>*Individual nurses                                                                                                                                             | *No evidence                                                                                                                                                                                                   | *Local<br>*National | *No evidence        |

|                       |     |                                                                                                                                                                                                                                                                                                                       |                                                                                                                                                                                                                                                                                                                                                                                                                                                                                        |                                                                                                                                                                                                                                                                                                                                                                                                                                                                                   |                                                                             |                                                                             |
|-----------------------|-----|-----------------------------------------------------------------------------------------------------------------------------------------------------------------------------------------------------------------------------------------------------------------------------------------------------------------------|----------------------------------------------------------------------------------------------------------------------------------------------------------------------------------------------------------------------------------------------------------------------------------------------------------------------------------------------------------------------------------------------------------------------------------------------------------------------------------------|-----------------------------------------------------------------------------------------------------------------------------------------------------------------------------------------------------------------------------------------------------------------------------------------------------------------------------------------------------------------------------------------------------------------------------------------------------------------------------------|-----------------------------------------------------------------------------|-----------------------------------------------------------------------------|
| <b>United Kingdom</b> | 41  | <ul style="list-style-type: none"> <li>*Need for health care providers for rural or underserved areas</li> <li>*Strong support for nursing practice</li> <li>*Consumer demand for increased access to health care</li> <li>*Other (reduced working hours of residents/junior doctors due to policy change)</li> </ul> | <ul style="list-style-type: none"> <li>*Government organizations within country</li> <li>*Nursing organizations within country</li> <li>*Physician organizations within country</li> <li>*Nongovernmental/nonprofit institution within country</li> <li>*Private institution within country</li> <li>*International organization</li> <li>*Individual nurses</li> <li>*Individual physicians</li> <li>*Consumers</li> <li>*Insurance companies</li> <li>*Other (university)</li> </ul> | <ul style="list-style-type: none"> <li>*Government organizations within country</li> <li>*Nursing organizations within country</li> <li>*Physician organizations within country</li> <li>*Private institution within country</li> <li>*Individual nurses</li> <li>*Individual physicians</li> <li>*Consumers</li> </ul>                                                                                                                                                           | <ul style="list-style-type: none"> <li>*Local</li> <li>*National</li> </ul> | <ul style="list-style-type: none"> <li>*Local</li> <li>*National</li> </ul> |
| <b>United States</b>  | 103 | <ul style="list-style-type: none"> <li>*Need for health care providers for rural or underserved areas</li> <li>*Strong support for nursing practice</li> <li>*Consumer demand for increased access to health care</li> <li>*Other (reduced working hours of residents/junior doctors due to policy change)</li> </ul> | <ul style="list-style-type: none"> <li>*Government organizations within country</li> <li>*Nursing organizations within country</li> <li>*Physician organizations within country</li> <li>*Nongovernmental/nonprofit institution within country</li> <li>*Private institution within country</li> <li>*International organization</li> <li>*Individual nurses</li> <li>*Individual physicians</li> <li>*Consumers</li> <li>*Insurance companies</li> <li>*Other (university)</li> </ul> | <ul style="list-style-type: none"> <li>*Government organizations within country</li> <li>*Nursing organizations within country</li> <li>*Physician organizations within country</li> <li>*Nongovernmental/nonprofit institution within country</li> <li>*Private institution within country</li> <li>*International organization</li> <li>*Individual nurses</li> <li>*Individual physicians</li> <li>*Consumers</li> <li>*Insurance companies</li> <li>*Other (media)</li> </ul> | <ul style="list-style-type: none"> <li>*Local</li> <li>*National</li> </ul> | <ul style="list-style-type: none"> <li>*Local</li> <li>*National</li> </ul> |

Low response countries in shaded gray
